# Supplementary material for: Pyronaridine–artesunate and artemether–lumefantrine for the treatment of uncomplicated Plasmodium falciparum malaria in Kenyan children: a randomized controlled non-inferiority trial
Source: Springer Nature journal article supplement (doi:10.1186/s12936-018-2340-3), 2018-05-15
Supplement: MOESM2 [file 15765414]

**Additional file 2: Parasite and fever clearance time**

|                                              | <b>pyronaridine-<br/>artesunate</b> | <b>artemether-<br/>lumefantrine</b> |
|----------------------------------------------|-------------------------------------|-------------------------------------|
| <b>Parasite clearance<sup>a</sup></b>        |                                     |                                     |
| Asexual parasite clearance on day 3, n/N (%) | 97/101 (96.0)                       | 91/96 (94.8)                        |
| Median clearance time, days (95% CI)         | 1 (1-2)                             | 2 (1-2)                             |
| Participants with clearance, % (95% CI) at:  |                                     |                                     |
| Day 1                                        | 55.5 (45.7-64.8)                    | 41.7 (32.3-51.7)                    |
| Day 2                                        | 89.1 (81.5-93.8)                    | 84.4 (75.8-90.3)                    |
| Day 3                                        | 96.0 (90.3-98.5)                    | 94.8 (88.4-97.8)                    |
| <b>Fever clearance</b>                       |                                     |                                     |
| Fever clearance on day 3, n/N (%)            | 53/53 (100)                         | 40/40 (100)                         |
| Median clearance time, days (95% CI)         | 1 (1-1)                             | 1 (1-1)                             |
| Participants with clearance, % (95% CI) at:  |                                     |                                     |
| Day 1                                        | 94.3 (84.6-98.1)                    | 95.0 (83.5-98.6)                    |
| Day 2                                        | 98.1 (90.1-99.7)                    | 100 (91.2-100)                      |
| Day 3                                        | 100 (93.2-100)                      | 100 (91.2-100)                      |

<sup>a</sup> Patients with missing data, for whom parasite clearance could not be determined, were treated as not having cleared parasites on day 3 (1 in the PA group and 3 in the AL group).
