# Supplementary material for: Pyronaridine–artesunate and artemether–lumefantrine for the treatment of uncomplicated Plasmodium falciparum malaria in Kenyan children: a randomized controlled non-inferiority trial
Source: Springer Nature journal article supplement (doi:10.1186/s12936-018-2340-3), 2018-05-15
Supplement: MOESM3 [file 15765414]

**Additional file 3: Haemoglobin (Hb), alanine aminotransferase (ALT) and aspartate aminotransferase (AST)**

values.

|                 | Day             | n   | pyronaridine-<br>artesunate | n  | artemether-<br>lumefantrine |
|-----------------|-----------------|-----|-----------------------------|----|-----------------------------|
| <b>Hb, g/dL</b> | <b>Baseline</b> | 101 | 11.8 (1.9) [6.2-15.8]       | 96 | 11.9 (2.1) [6.8-16.4]       |
|                 | <b>3</b>        | 97  | 11.0 (1.8) [6.2-14.8]       | 89 | 11.3 (2.0) [6.3-15.6]       |
|                 | <b>7</b>        | 99  | 11.4 (1.6) [7.6-14.4]       | 91 | 11.6 (1.7) [6.7-14.8]       |
|                 | <b>28</b>       | 90  | 12.0 (1.5) [8.2-15.9]       | 80 | 12.0 (1.8) [6.9-15.2]       |
| <b>ALT, U/L</b> | <b>3</b>        | 66  | 11.0 (6.3) [0-29]           | 61 | 11.8 (8.6) [0-45]           |
|                 | <b>7</b>        | 65  | 11.7 (7.5) [0-39]           | 60 | 11.2 (6.0) [0-24]           |
| <b>AST, U/L</b> | <b>3</b>        | 62  | 19.6 (7.6) [5-41]           | 52 | 21.2 (8.9) [1-46]           |
|                 | <b>7</b>        | 62  | 21.0 (8.0) [7-52]           | 63 | 21.5 (8.2) [7-49]           |

Data are mean (SD) [range] or number.
